# Supplementary material
Source: PubMed Central journal article supplement (PMC7511448)

# Supplementary Figure 1

1A

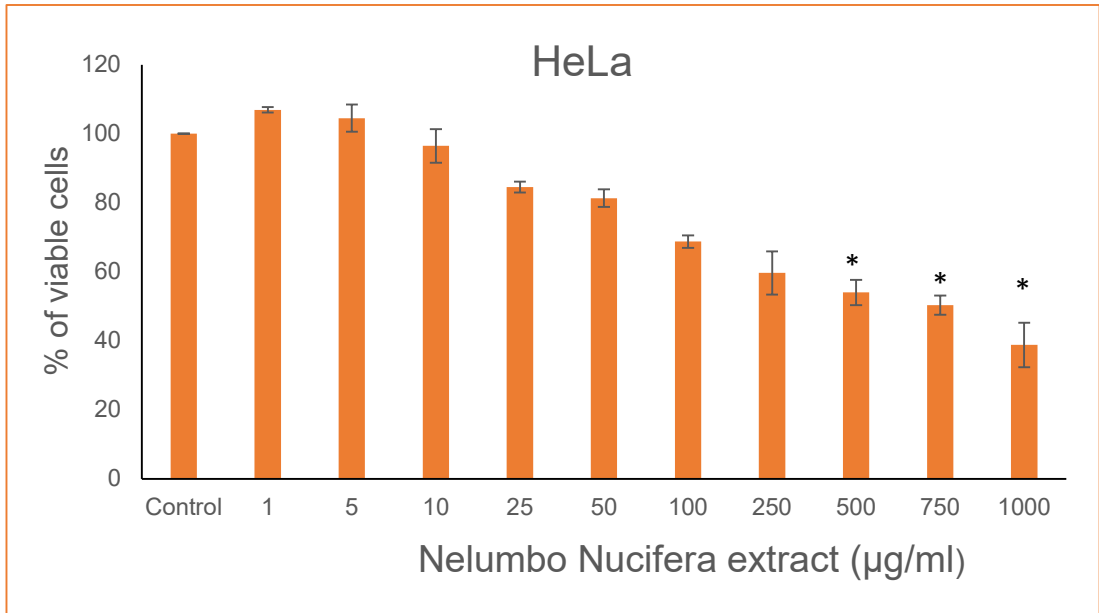

1B

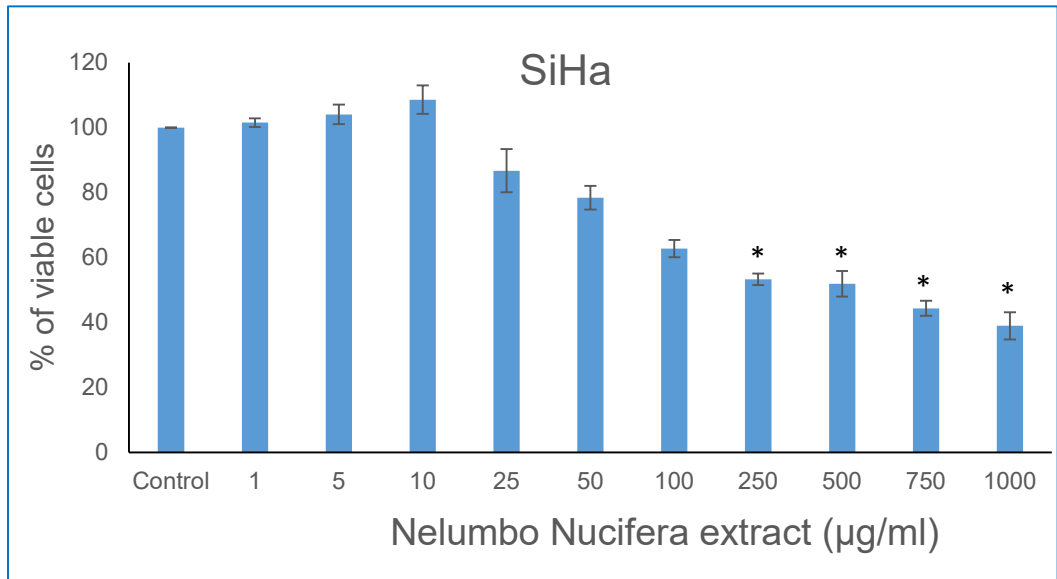

## Supplementary figure 2

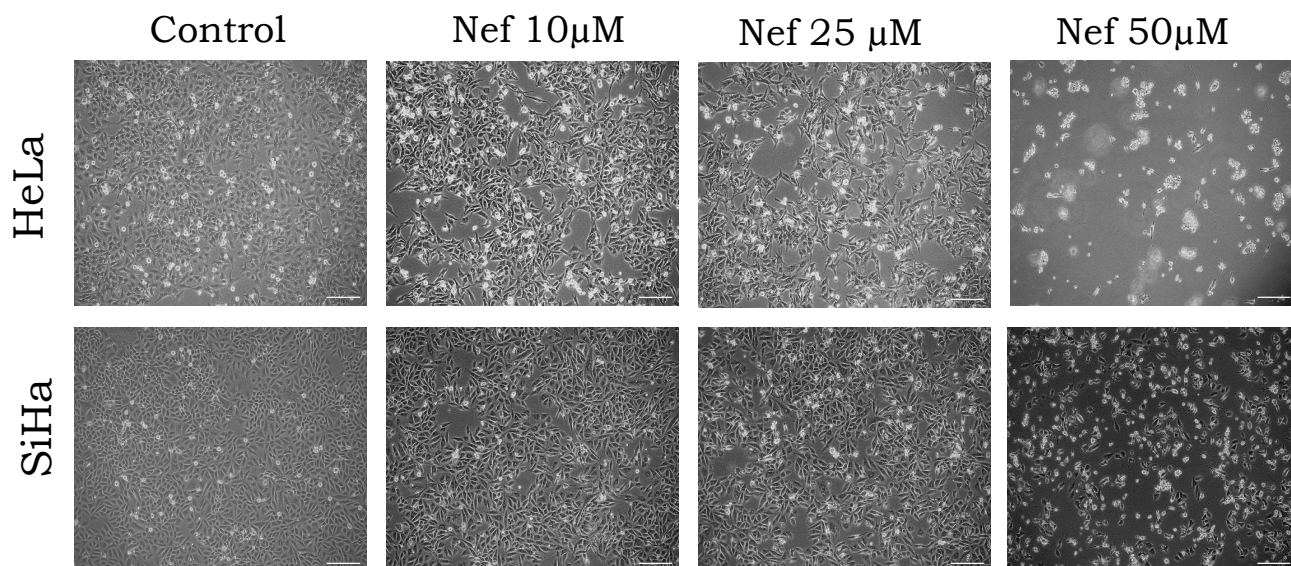

## Supplementary figure 3

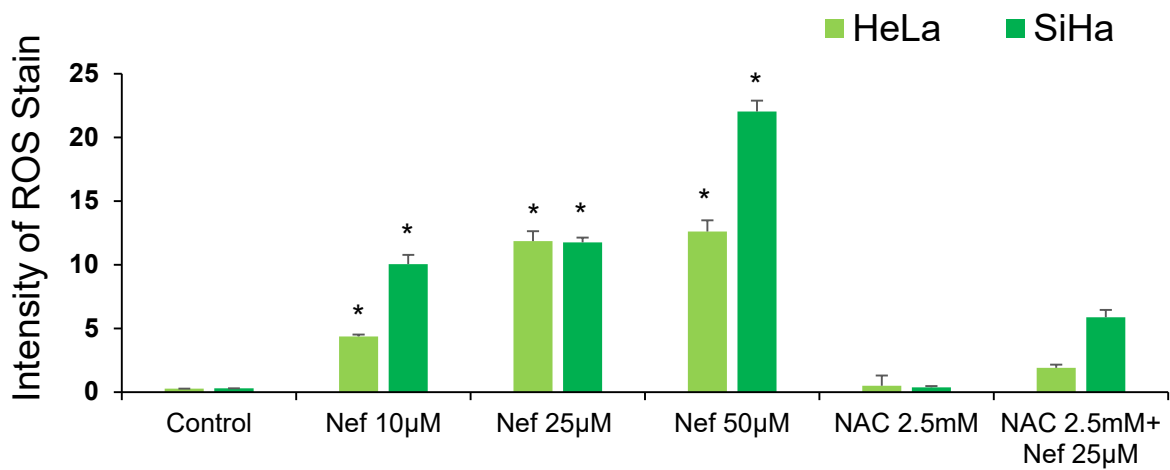

# Supplementary figure 4

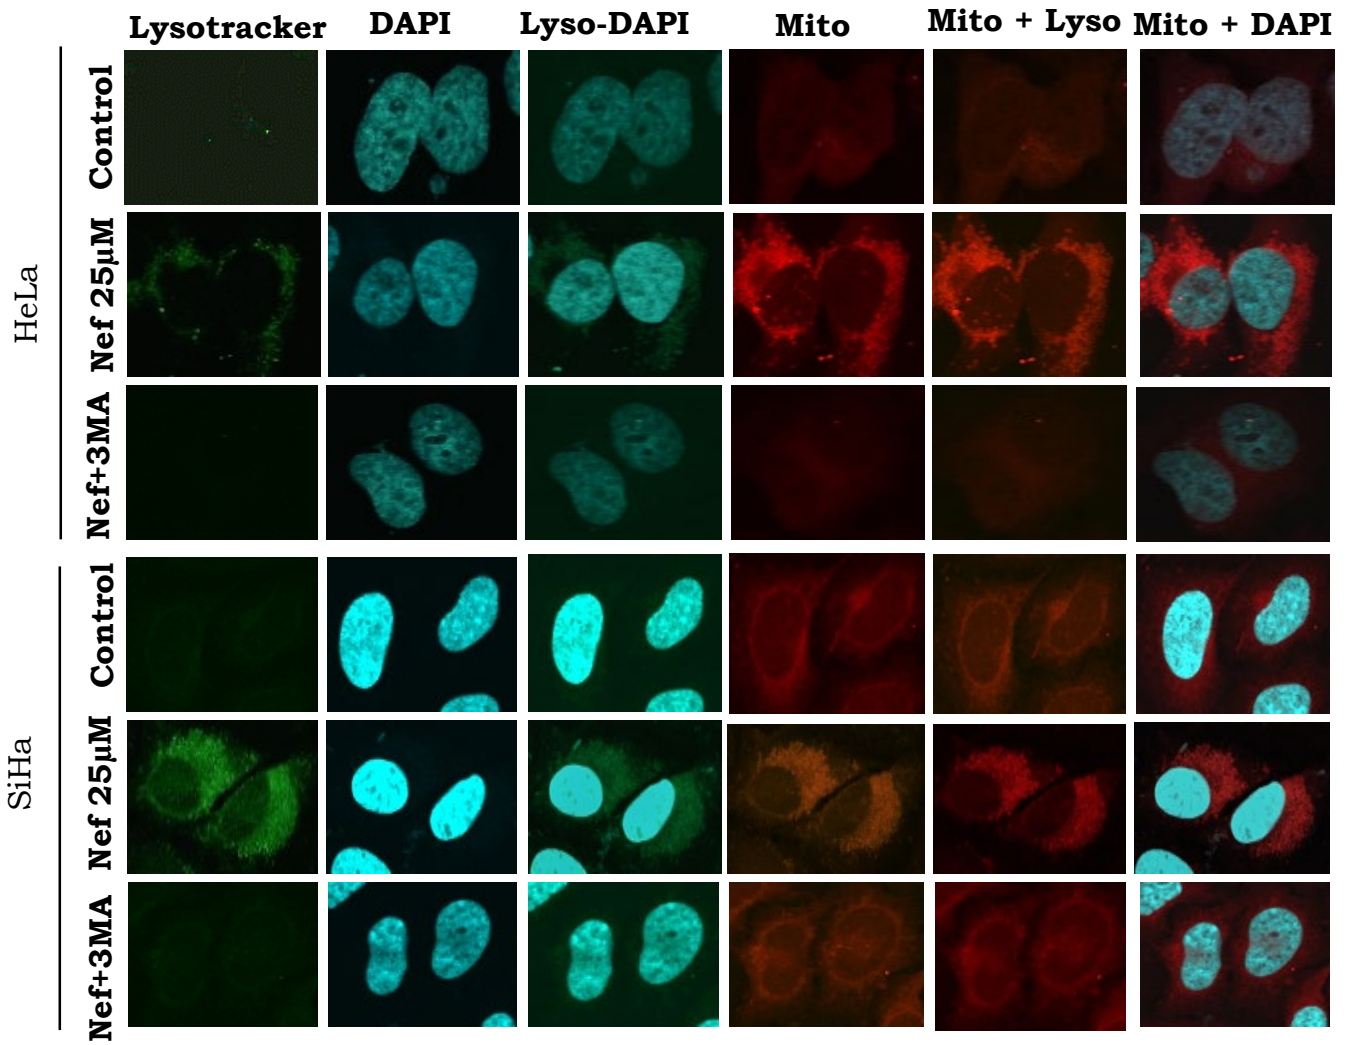

Supplement: NIHMS1609874-supplement-Supplementary_Material.pdf [file NIHMS1609874-supplement-Supplementary_Material.pdf]
